# Supplementary material
Source: PubMed Central journal article supplement (PMC5101157)

**Figure S2.** T-statistics from group model for each contrast: **A.** Main effect of sleep (late > normal), **B.** Main effect of meal (normal > late), **C.** Main effect of meal (late > normal), and **D.** Sleep by meal interaction for every seed in which significant effects were found (FWE  $p < 0.005$  for L and R amygdala, FWE  $p < 0.05$  for the rest of the seeds). Whenever multiple clusters had significant effects for a seed, all clusters are plotted, starting with the largest one.

**A. Main effect of sleep:  
late > normal**

**B. Main effect of meal:  
normal > late**

L Insula

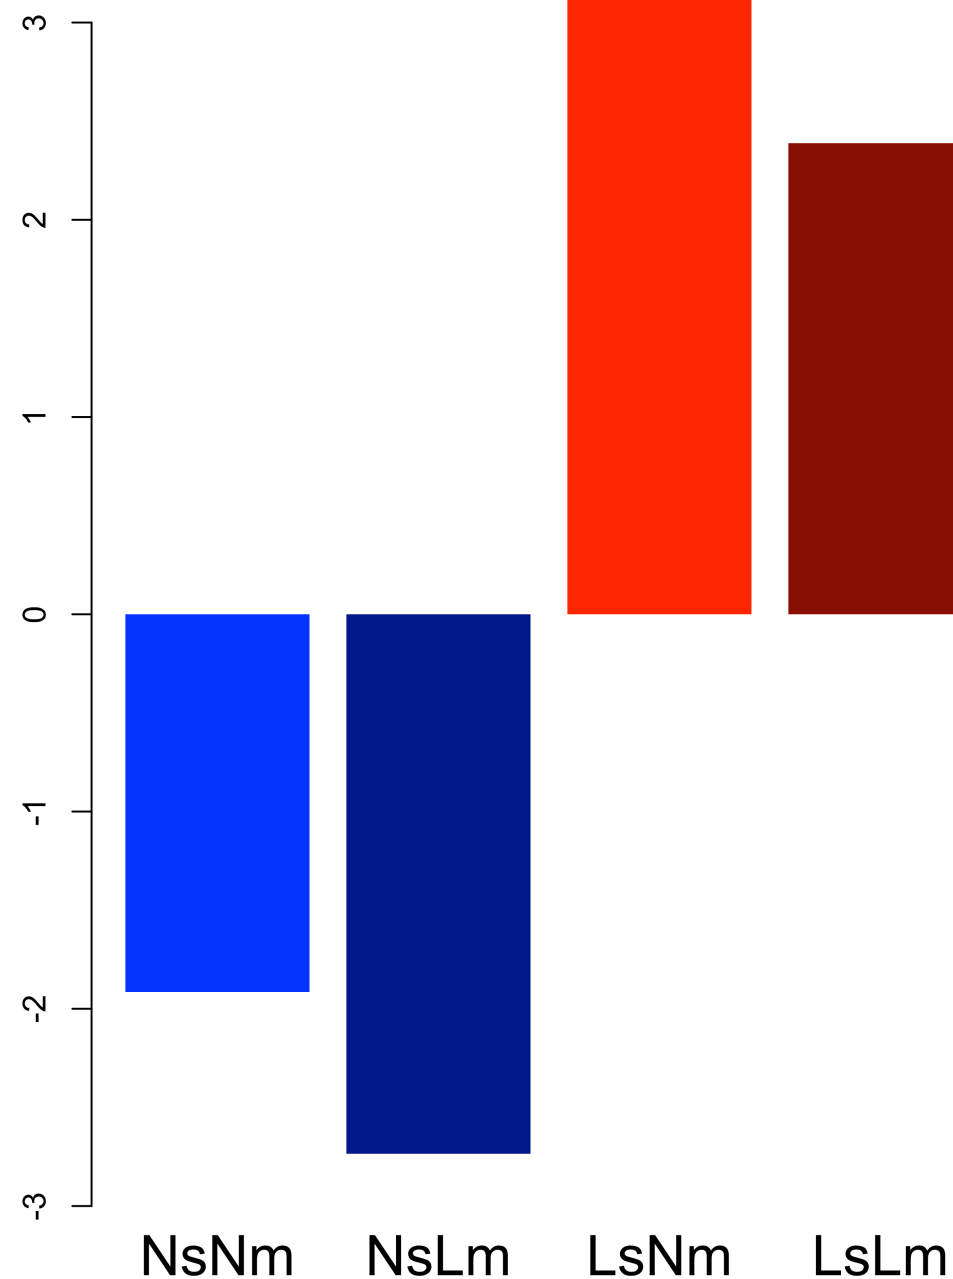

L Central Opercular  
cortex

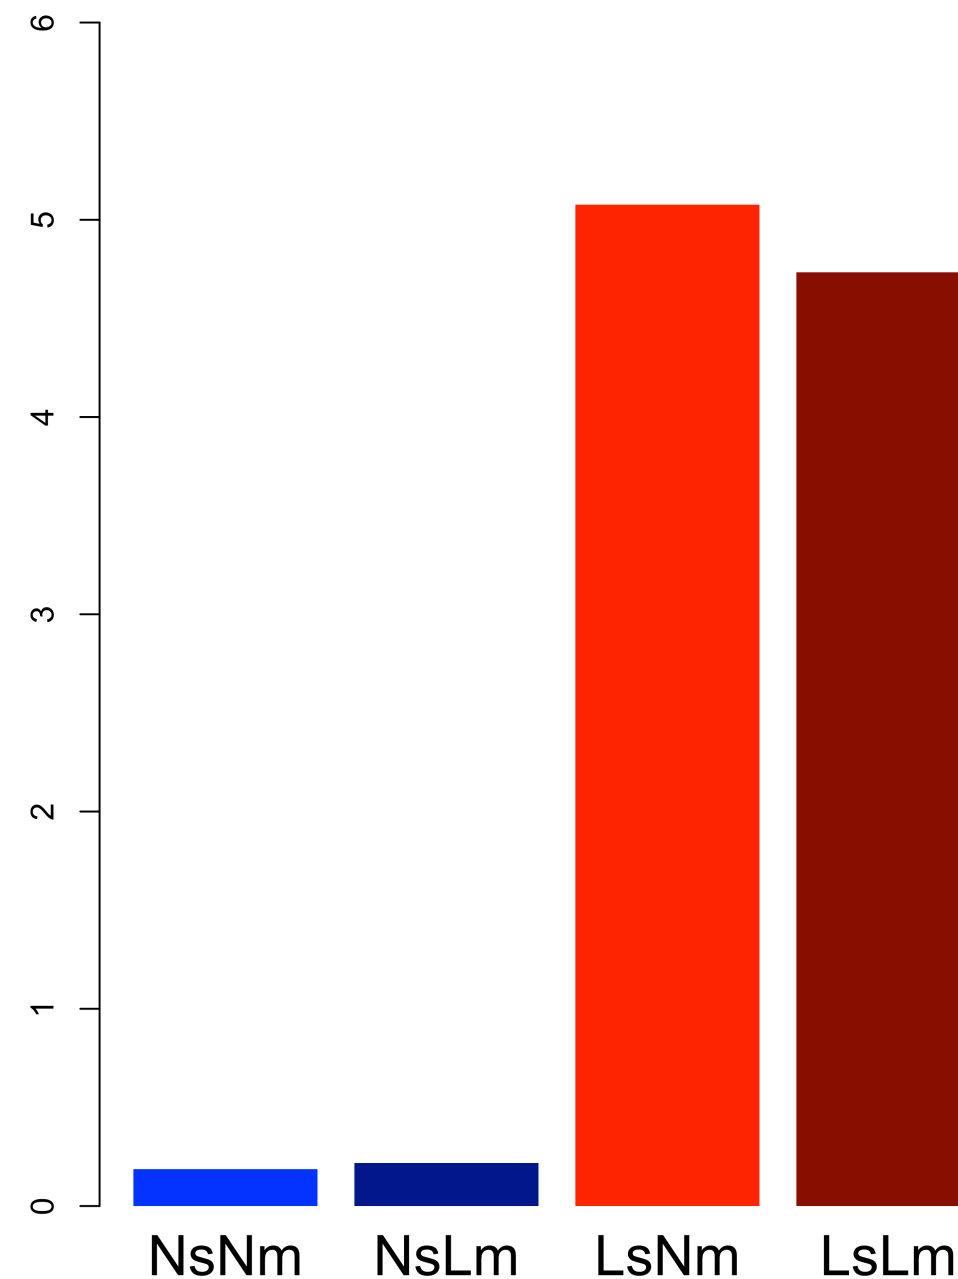

L Central Opercular  
cortex

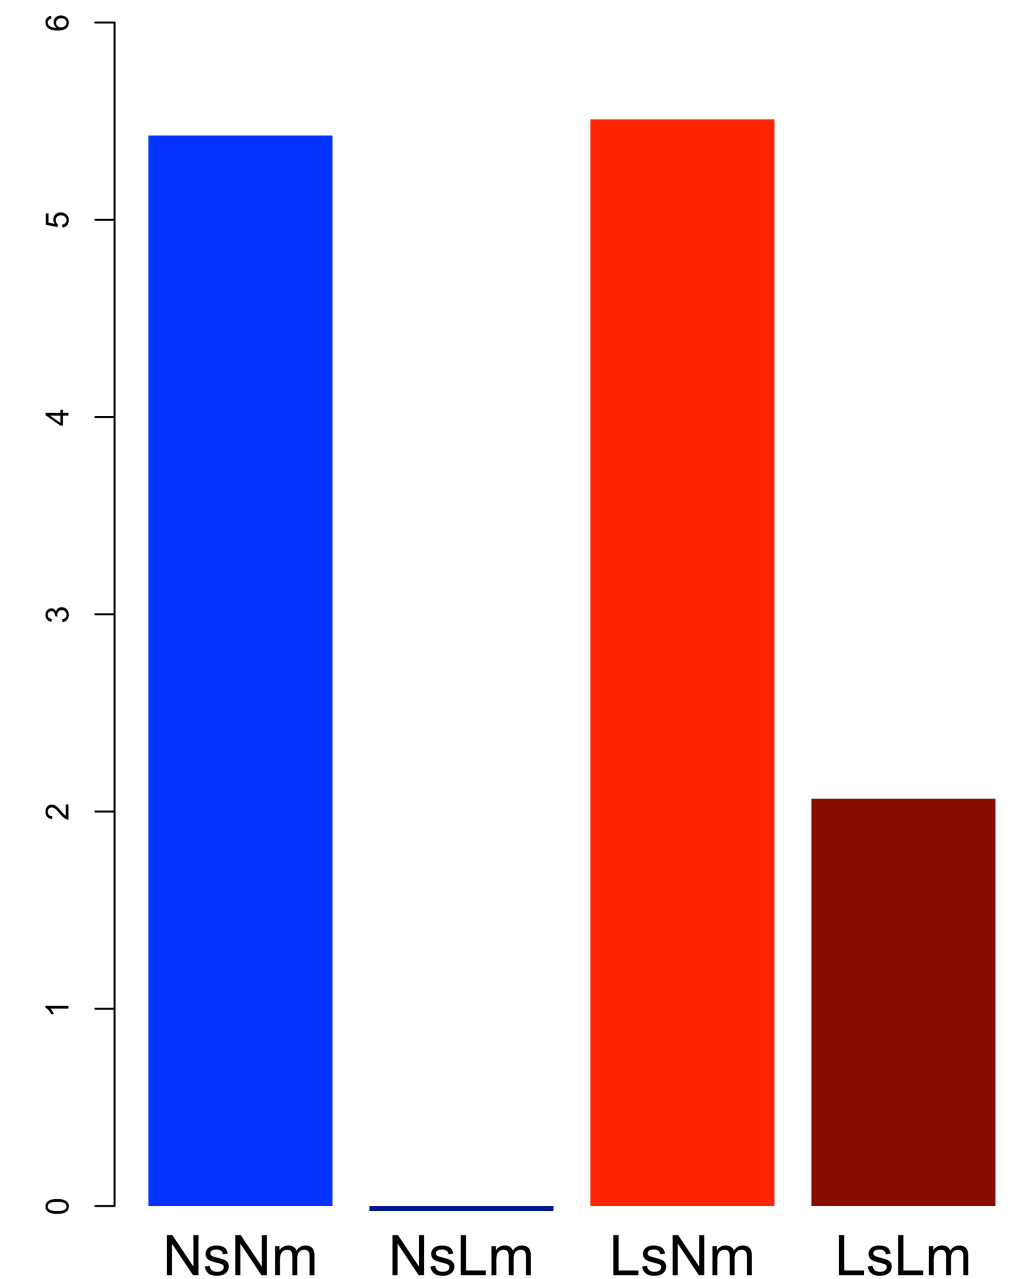

# C. Main effect of meal: late > normal

## Midcingulate cortex

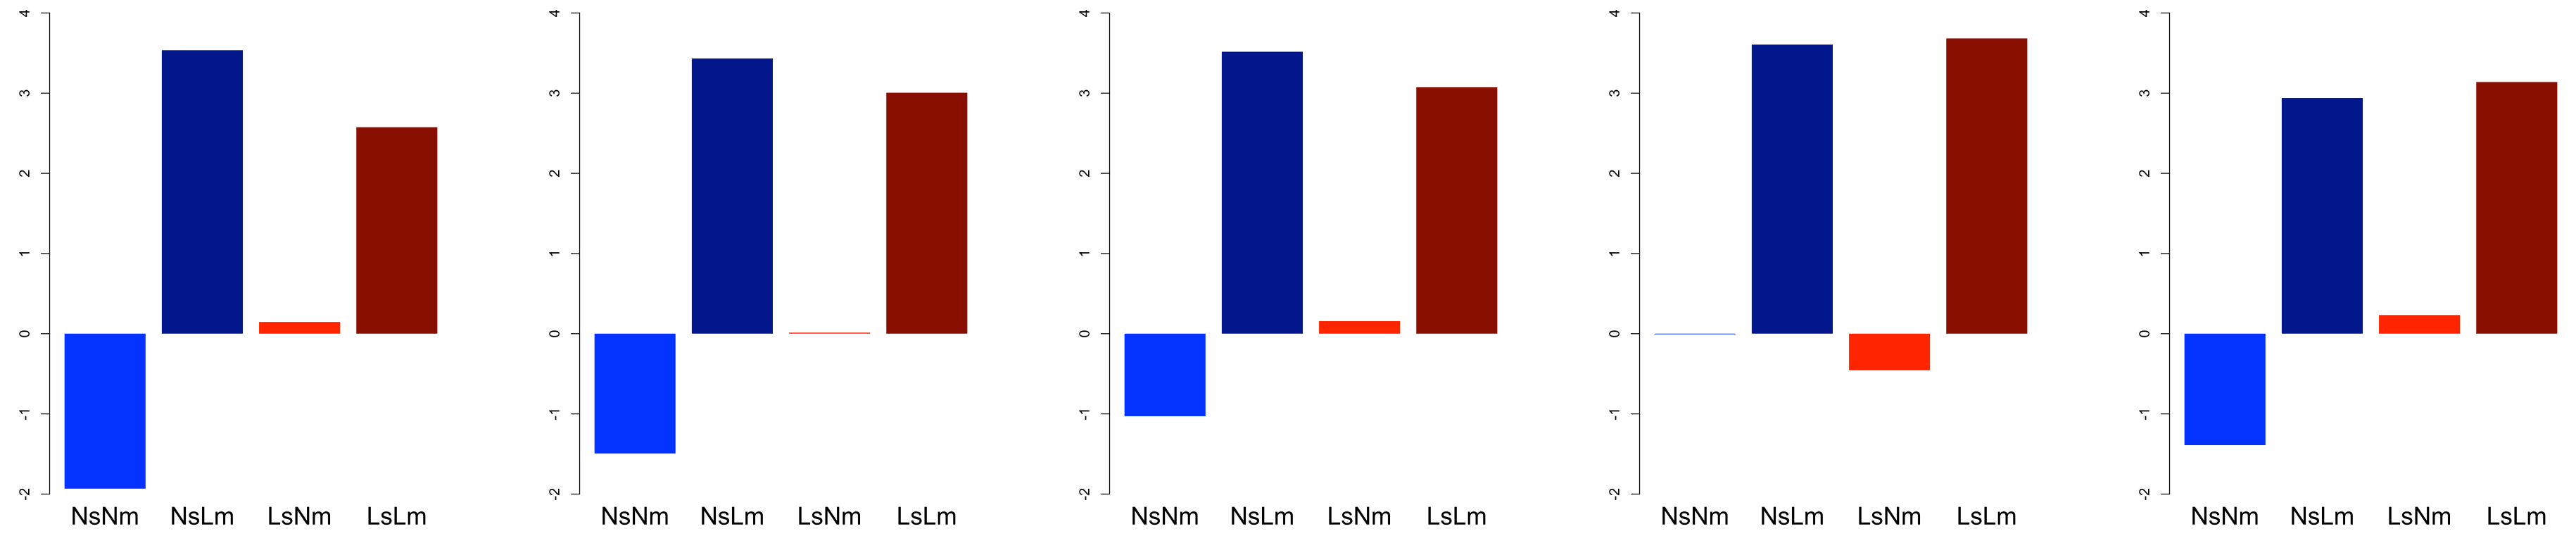

## Precuneus

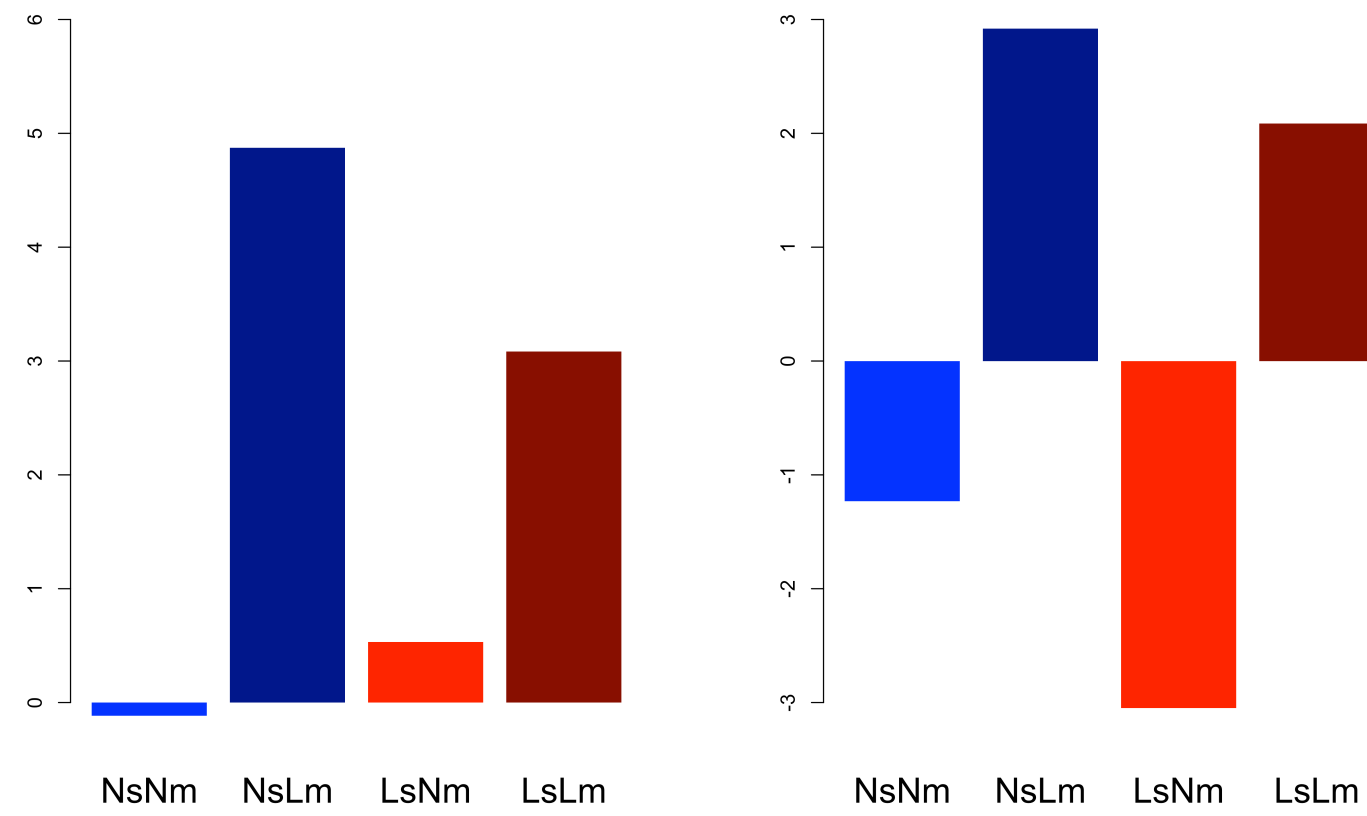

## Pons

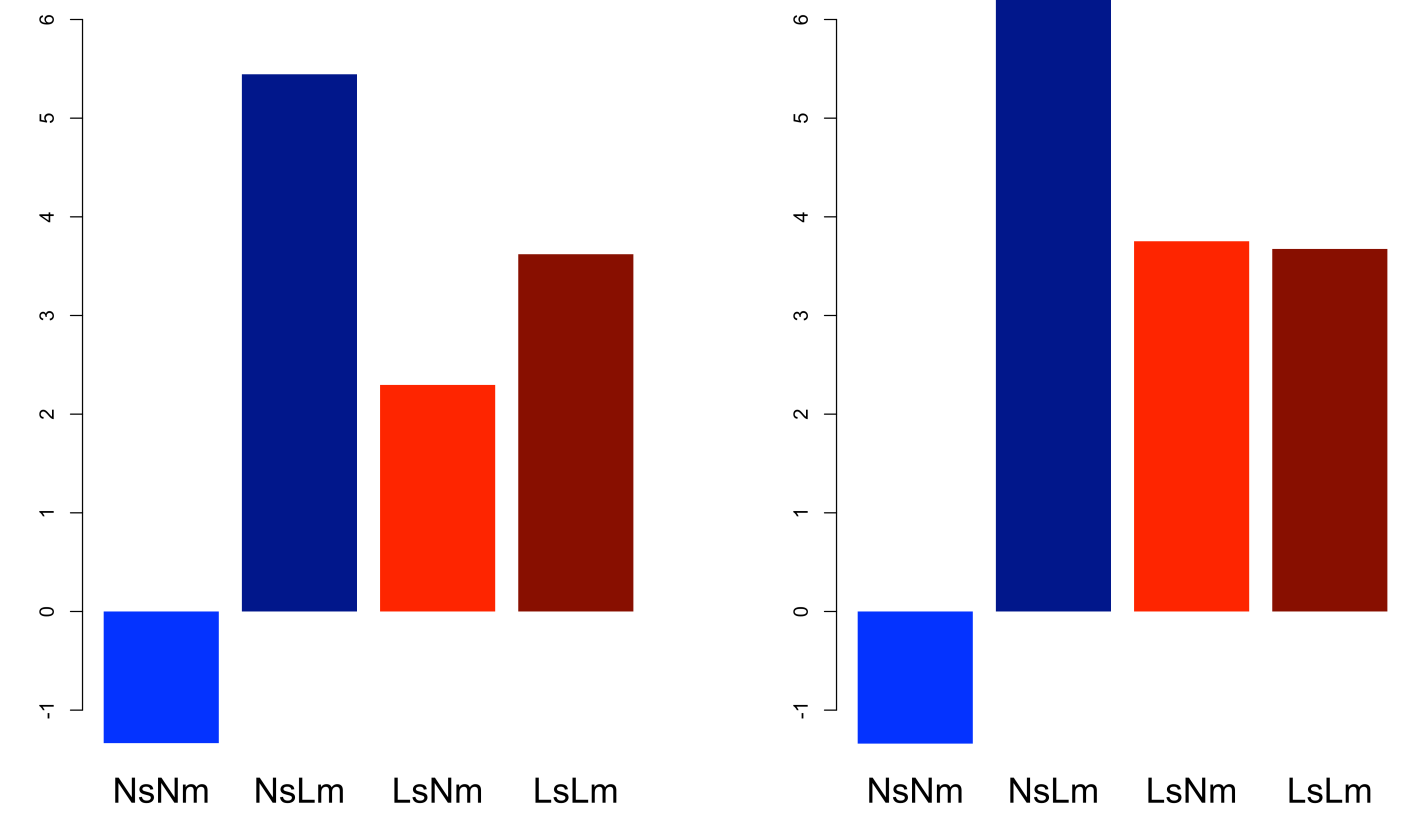

# C. Main effect of meal: late > normal

## L Amygdala

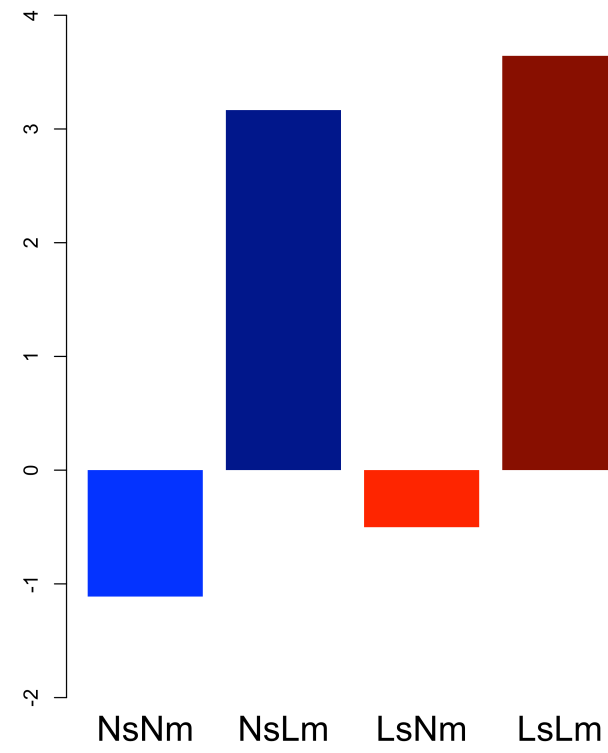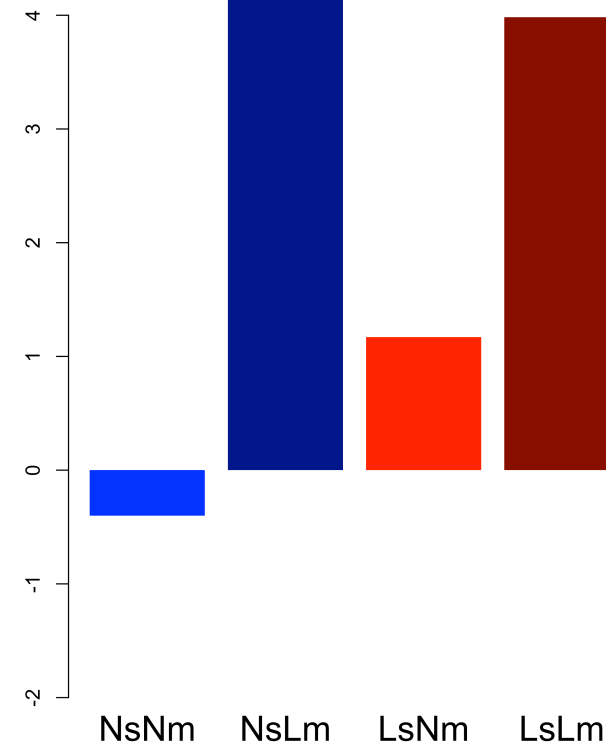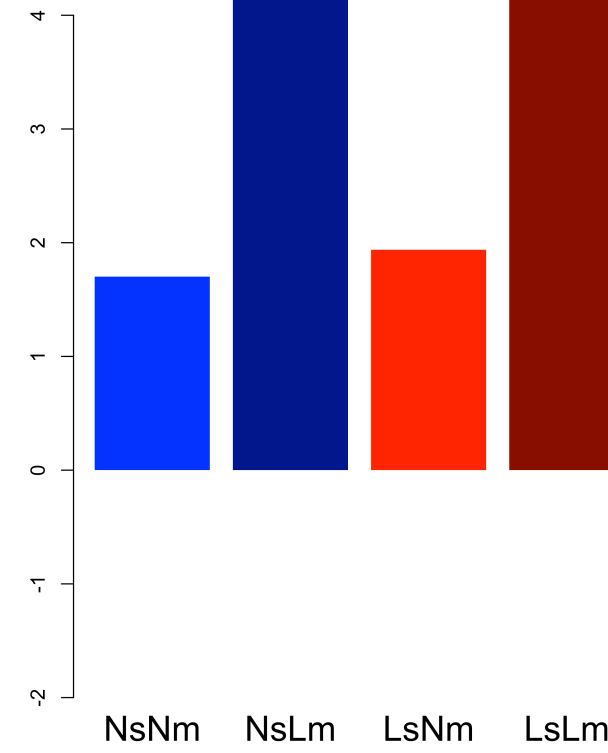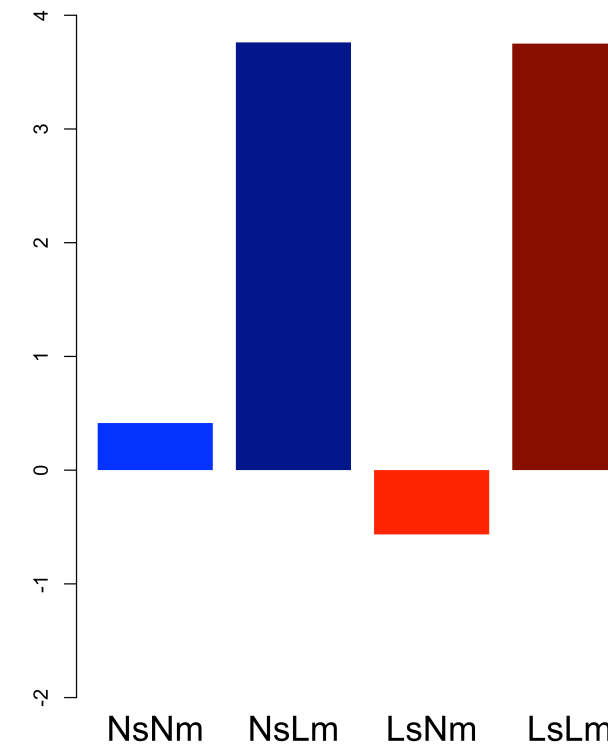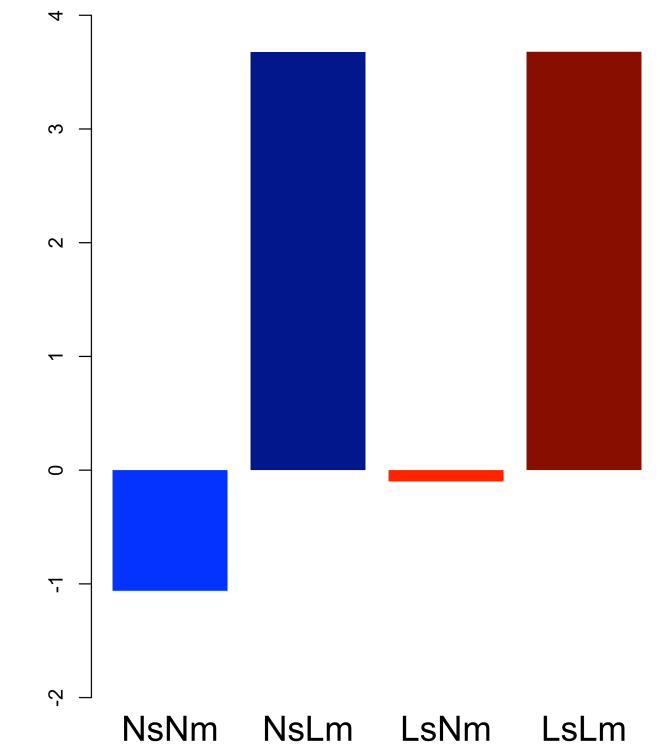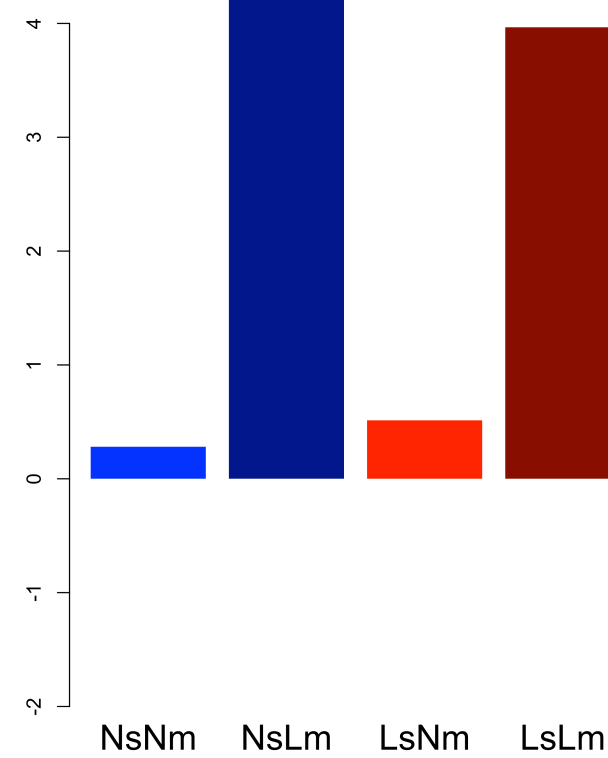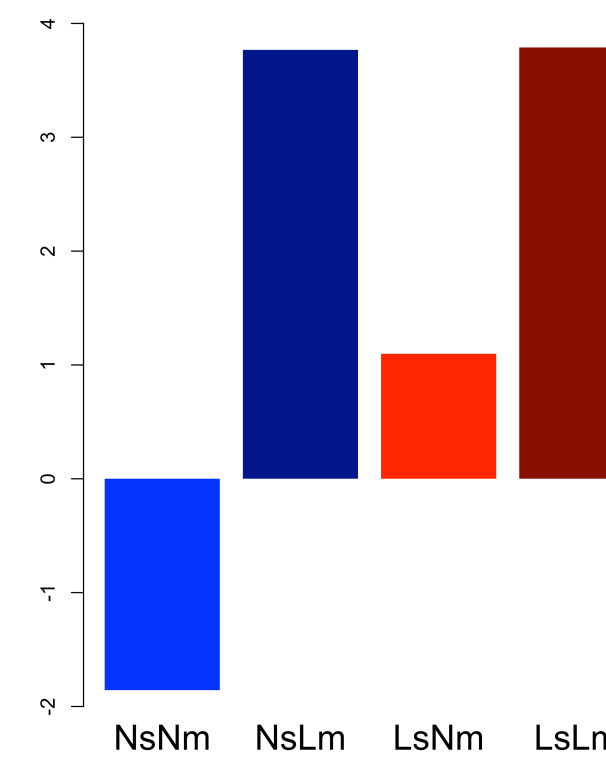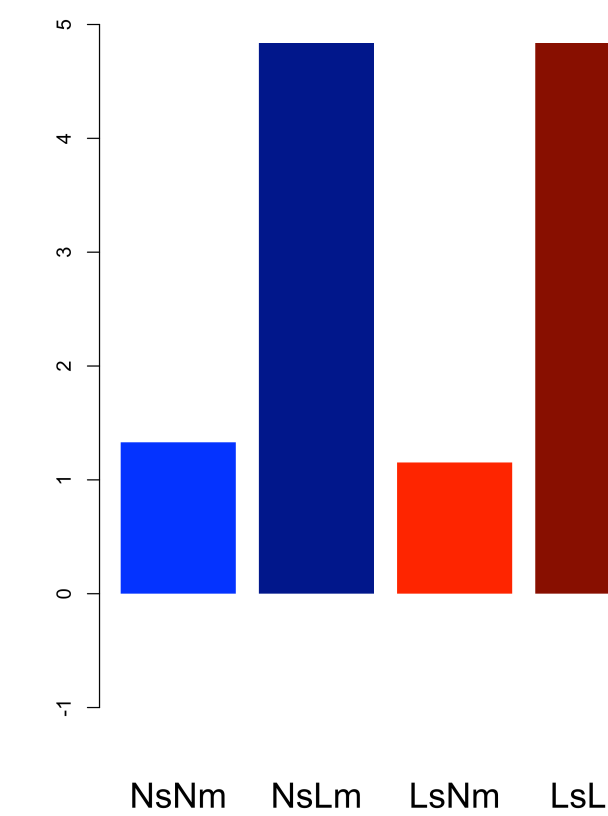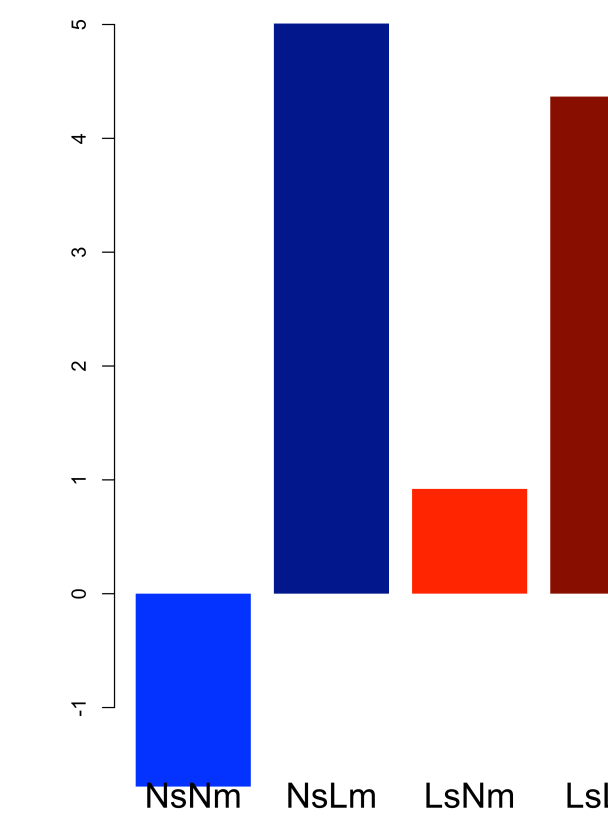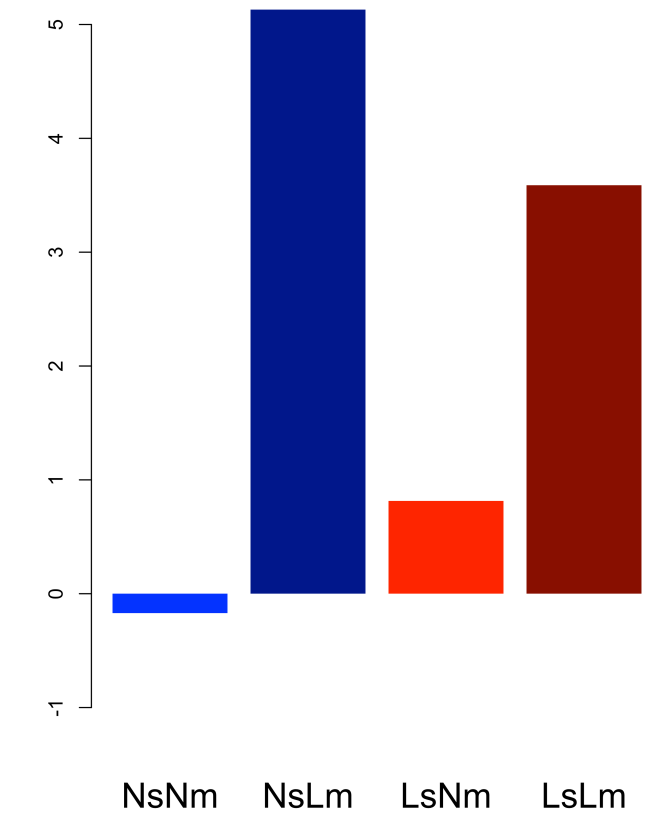

# C. Main effect of meal: late > normal

## R Amygdala

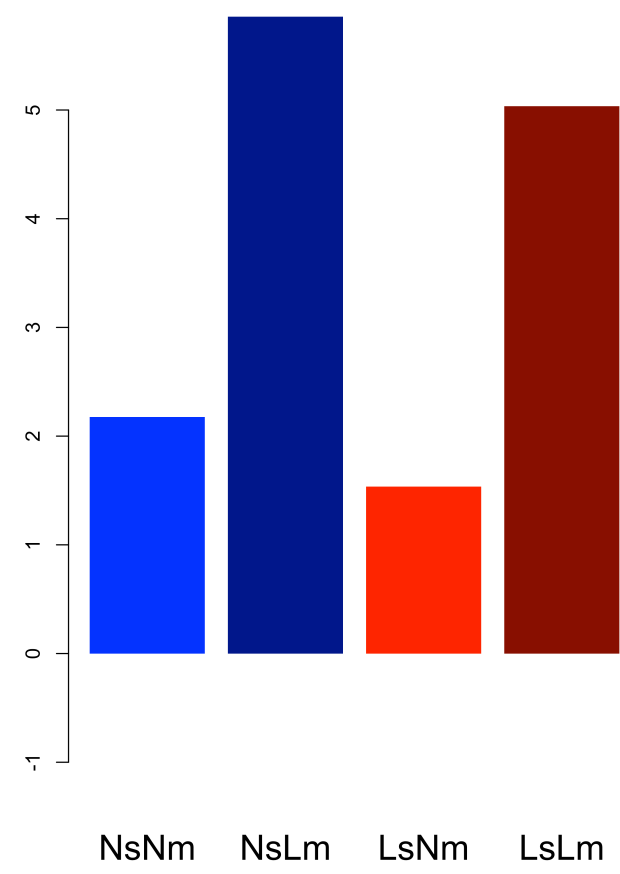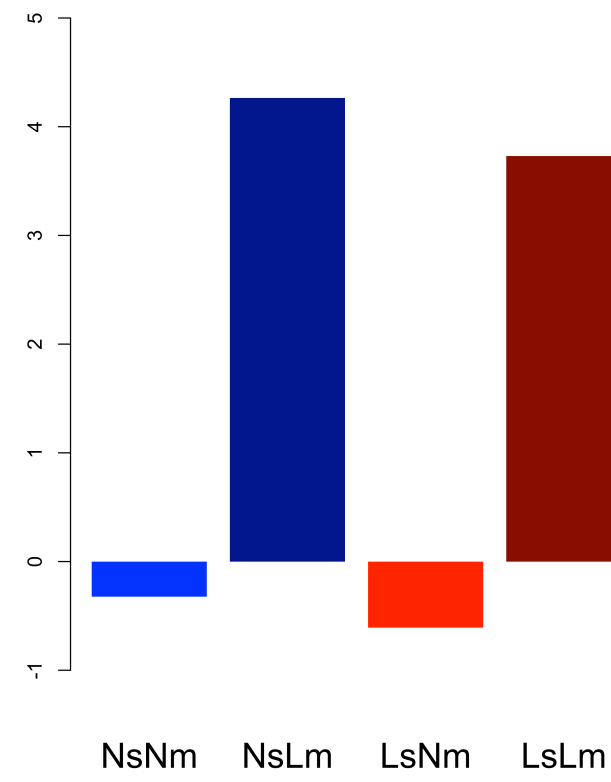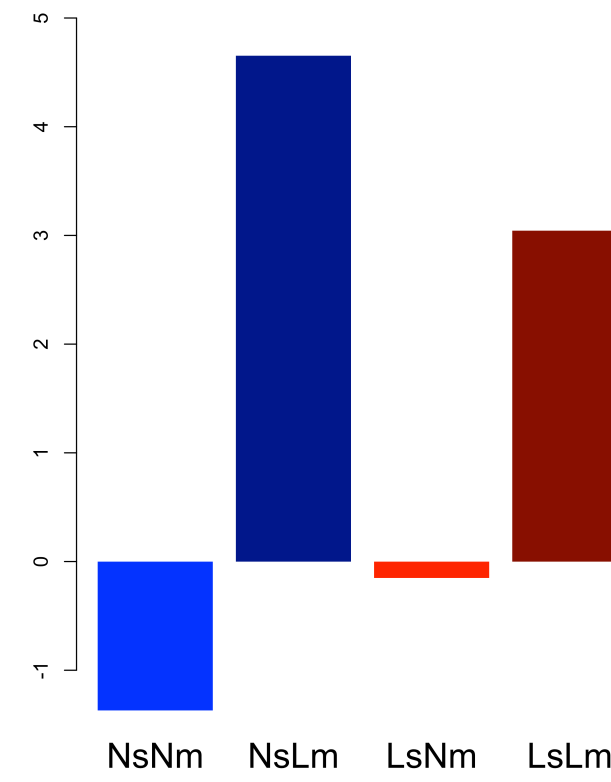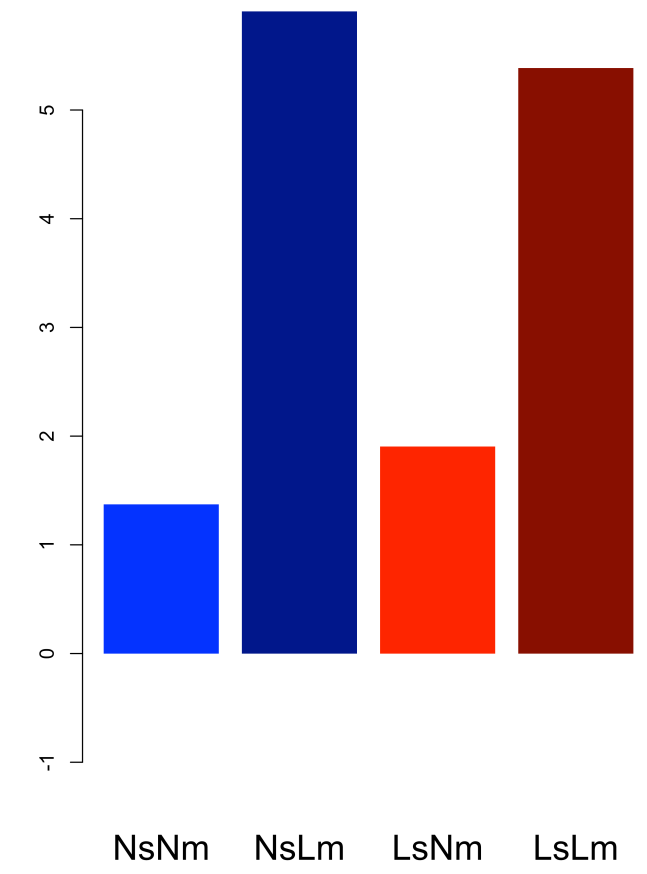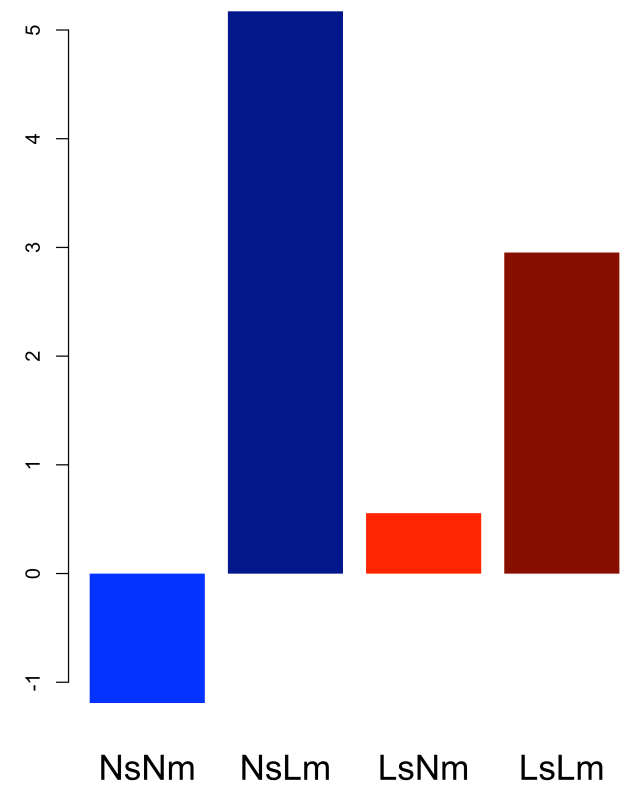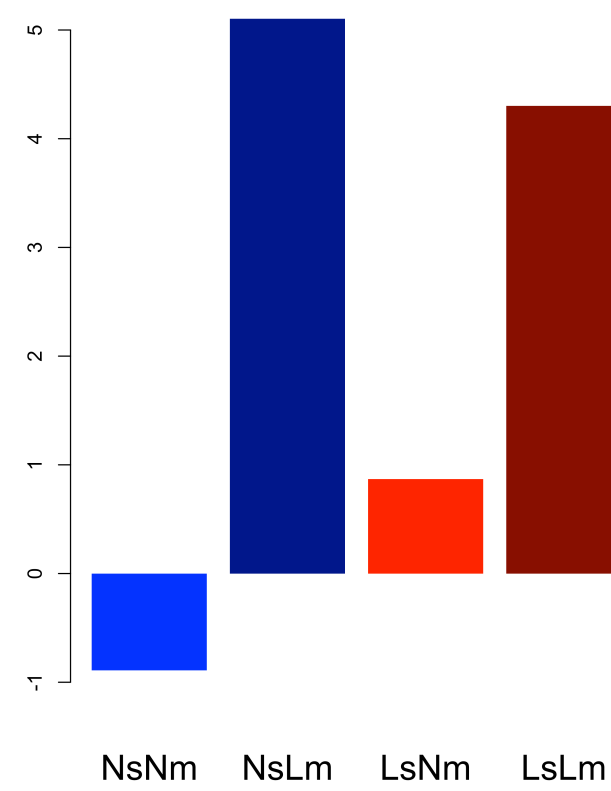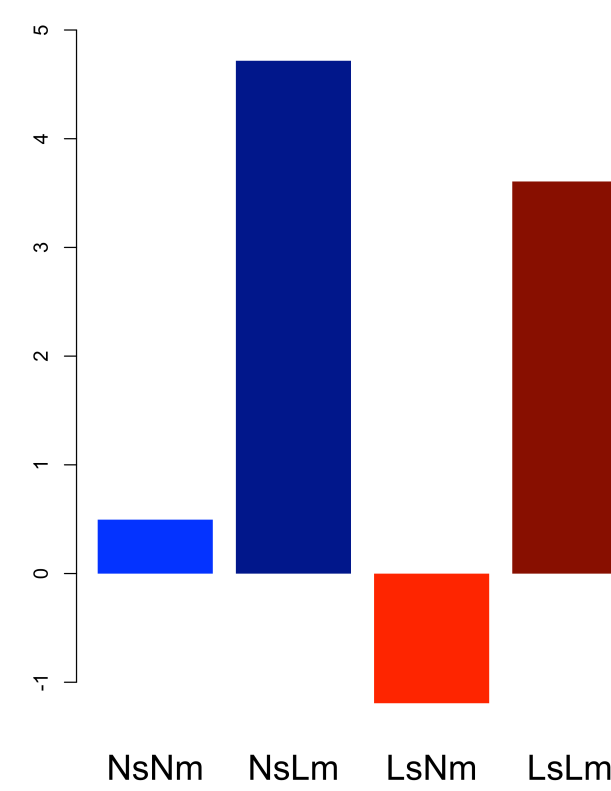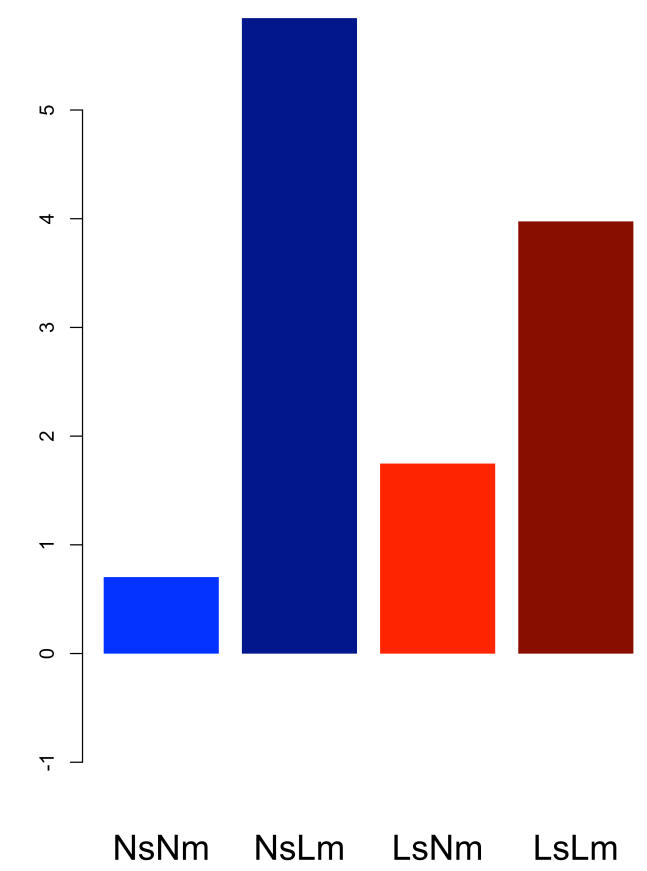

## C. Main effect of meal: late > normal

### R Superior temporal gyrus

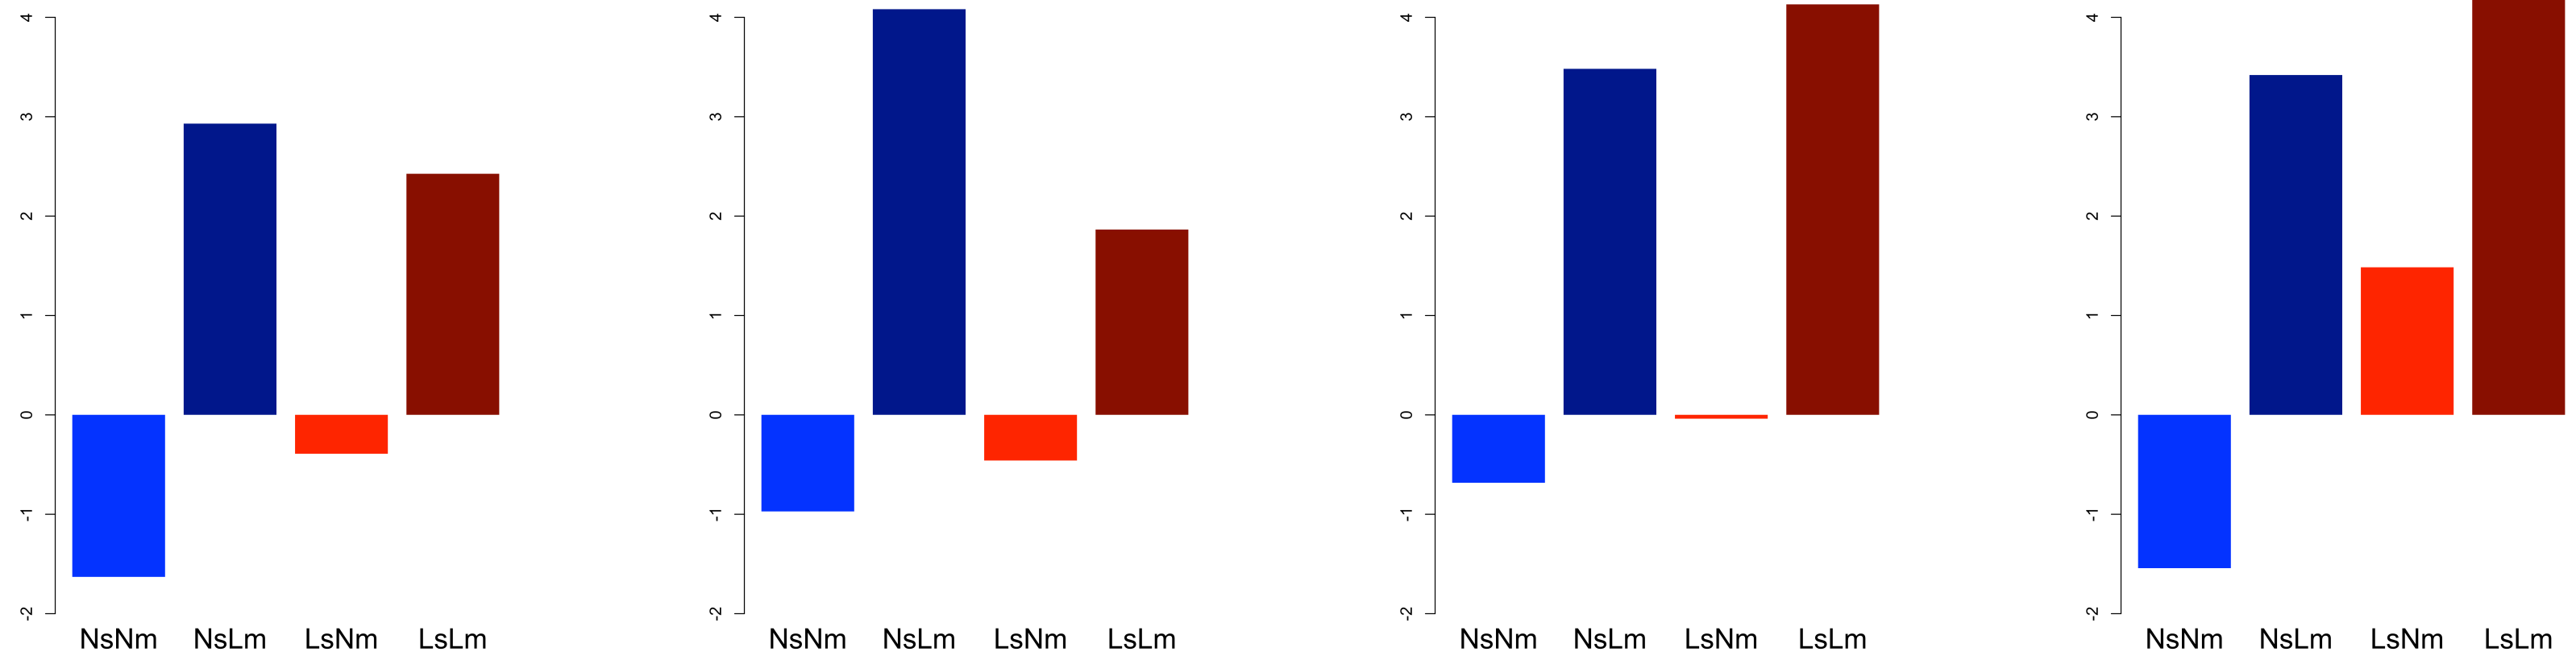

## C. Main effect of meal: late > normal

### L Ventral striatum

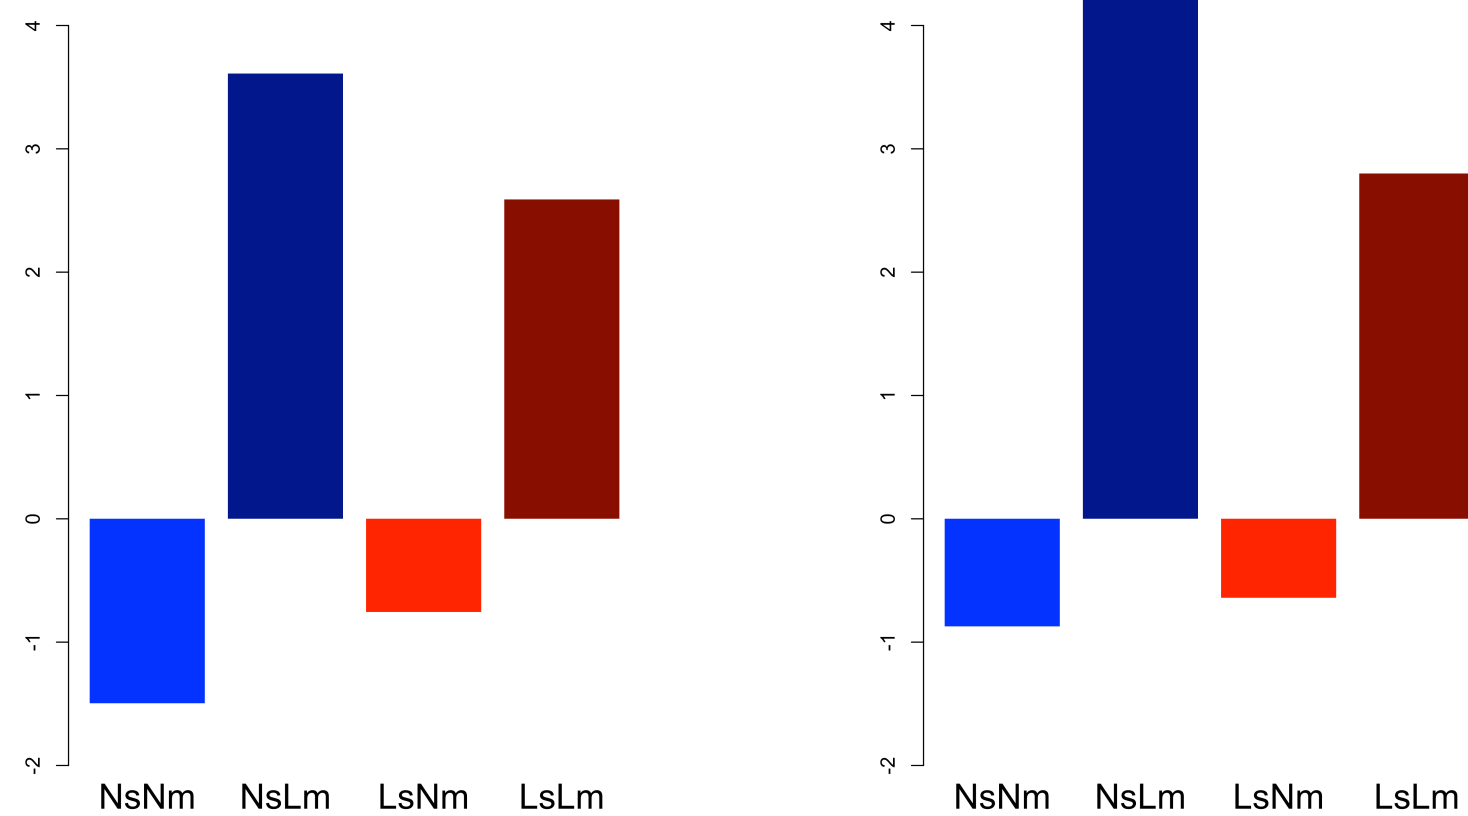

## D. Sleep by meal interaction

### R Superior temporal gyrus

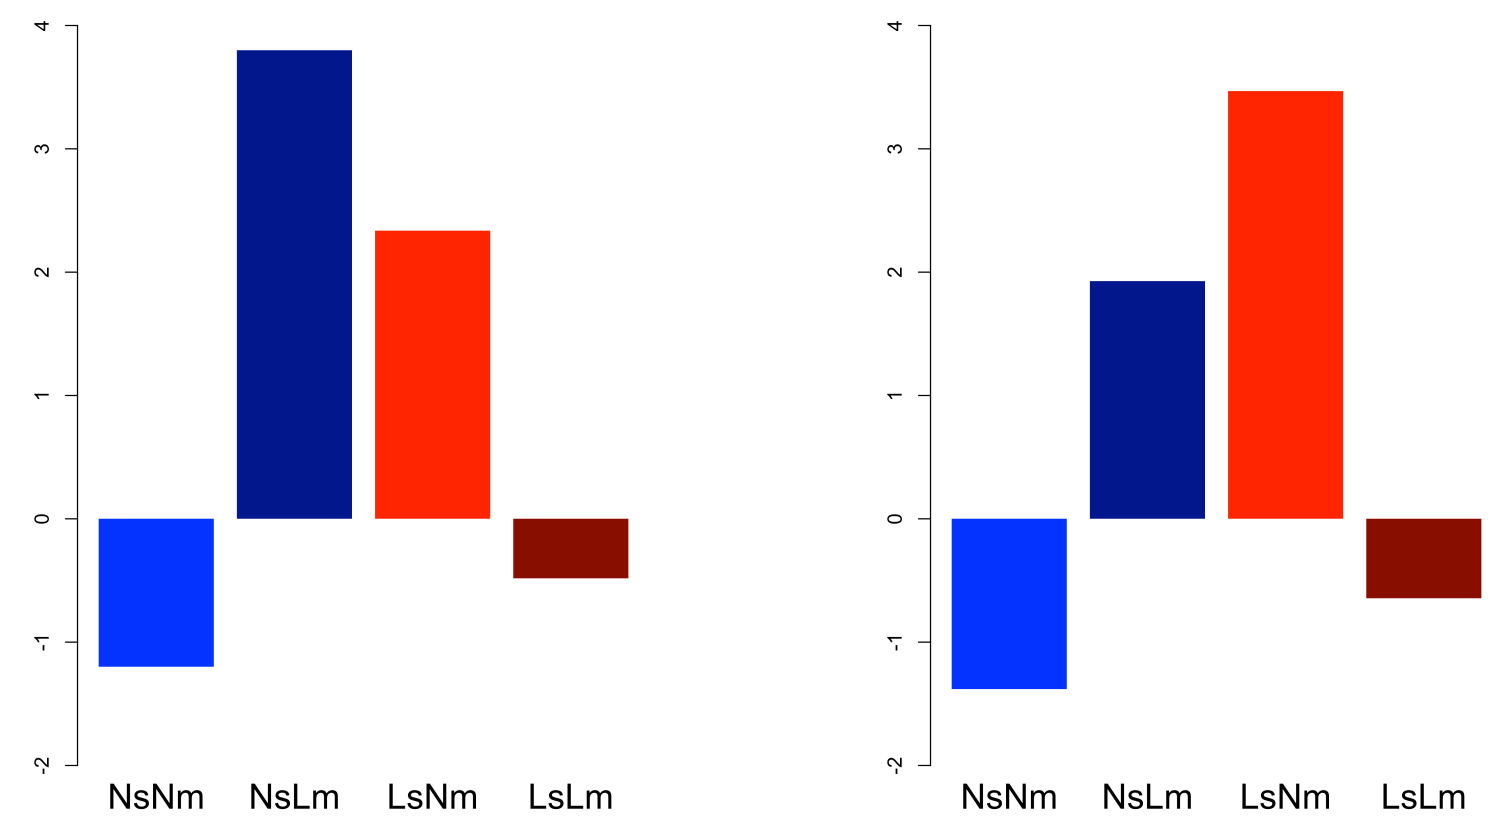

# D. Sleep by meal interaction

## Frontal Pole

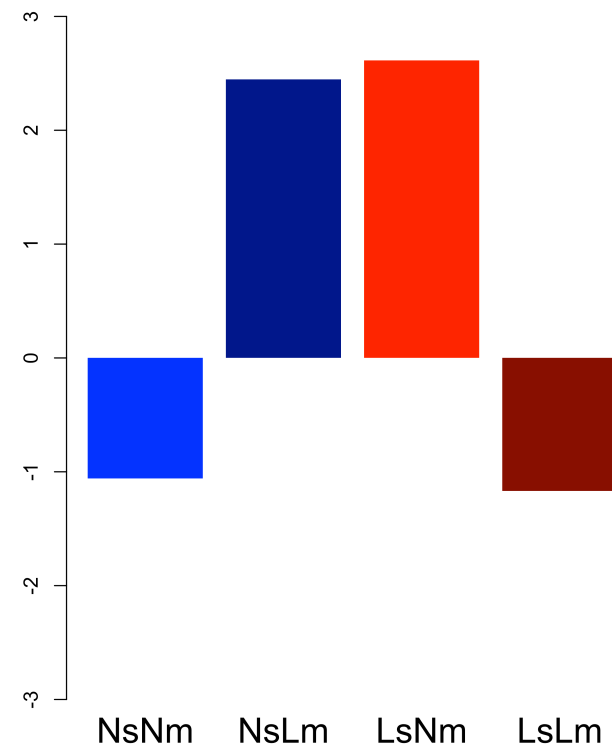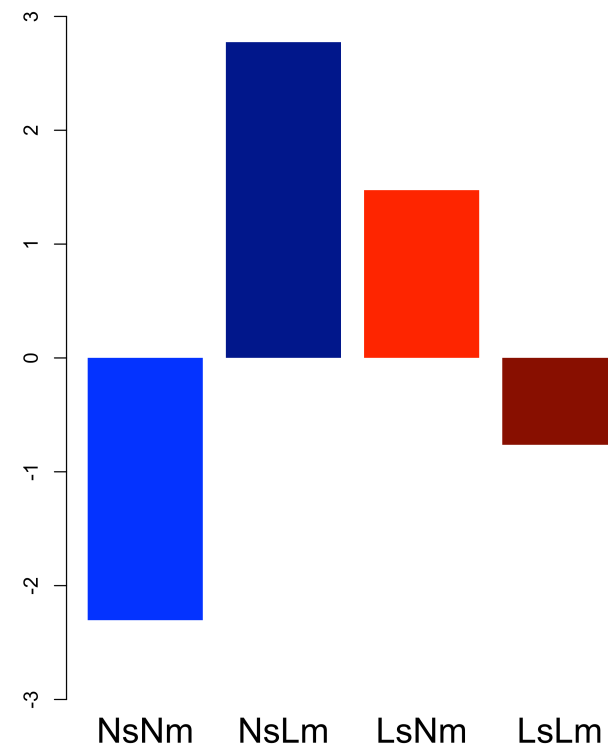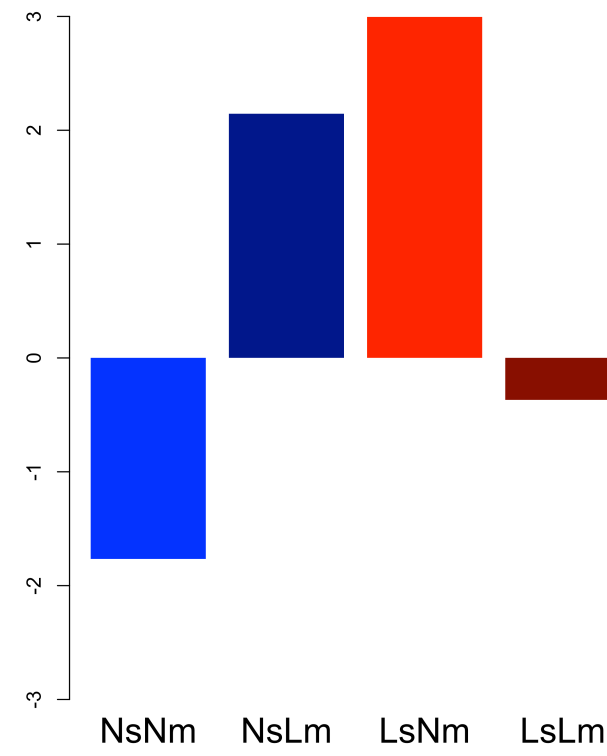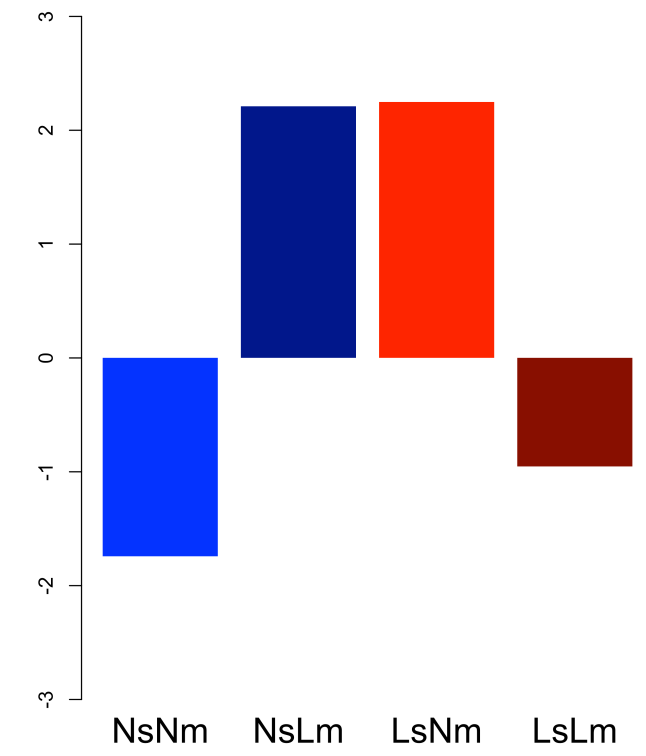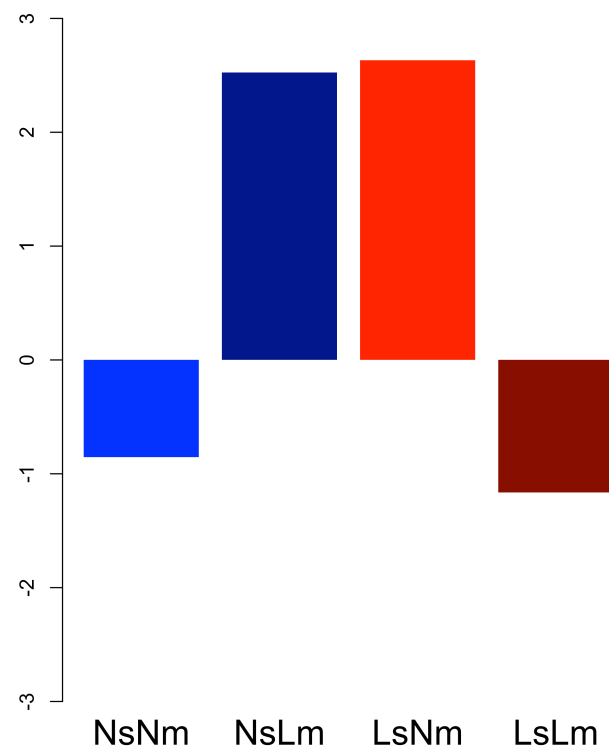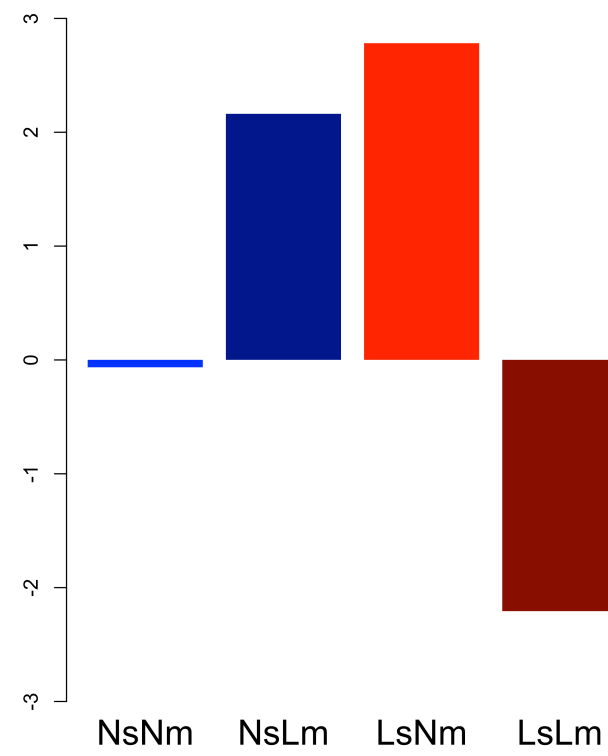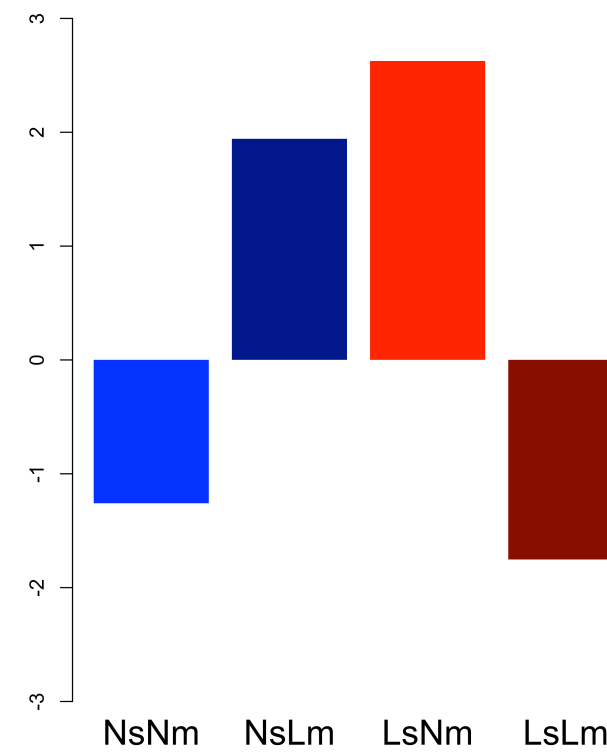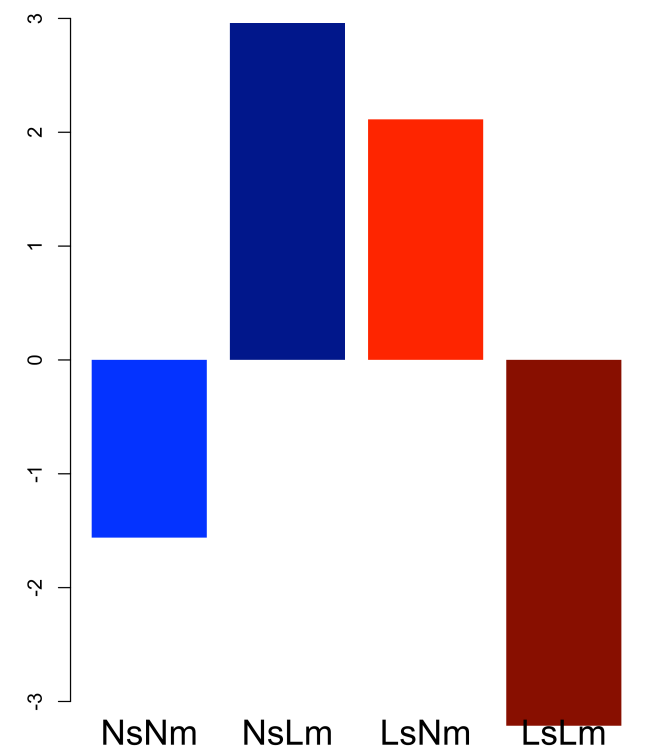

Supplement: NIHMS800458-supplement-4.pdf [file NIHMS800458-supplement-4.pdf]
