# Supplementary material
Source: PubMed Central journal article supplement (PMC5101157)
Supplement: NIHMS800458-supplement-2.pdf [file NIHMS800458-supplement-2.pdf]

**Table S1.** Significant differences in seed-based resting-state functional connectivity (RSFC) for meal timing (Nm vs. Lm), sleep timing (Ns vs. Ls), and sleep-by-meal interactions. Reported effects are significant controlling for family-wise error (FWE) rate at  $\alpha=0.05$ , except for L amygdala and R amygdala (denoted with \*) where effects are significant controlling for FWE rate at  $\alpha=0.005$ , a threshold equivalent to Bonferroni correction for the number of seeds examined.

|                                     | Seed center (MNI)                       |  | Cluster  |                         |       |       |         |                                                       |
|-------------------------------------|-----------------------------------------|--|----------|-------------------------|-------|-------|---------|-------------------------------------------------------|
|                                     |                                         |  | # voxels | Center of gravity (MNI) |       |       | p-value | Major structures associated with the cluster          |
|                                     |                                         |  |          | x                       | y     | z     |         |                                                       |
| Contrast                            |                                         |  |          |                         |       |       |         |                                                       |
| Main effect of sleep: late > normal |                                         |  |          |                         |       |       |         |                                                       |
|                                     | L Insula (-42, -10, 4)                  |  | 27       | 5.2                     | -36.8 | 67.4  | 0.038   | R somatosensory cortex, post-central gyrus, precuneus |
|                                     | L Central opercular cortex (-52, 6, -2) |  | 26       | -38.1                   | -21.5 | 51.2  | 0.030   | L somatosensory cortex, pre-/post-central gyrus       |
| Main effect of meal: normal > late  |                                         |  |          |                         |       |       |         |                                                       |
|                                     | L Central opercular cortex (-52, 6, -2) |  | 7        | 13.7                    | -43.1 | 58.9  | 0.037   | R post-central gyrus, precuneus                       |
| Main effect of meal: late > normal  |                                         |  |          |                         |       |       |         |                                                       |
|                                     | Midcingulate cortex (4, -8, 42)         |  | 103      | -40.2                   | 18.8  | 47.6  | 0.030   | L middle frontal gyrus                                |
|                                     |                                         |  | 40       | -10.4                   | 29.3  | 41.6  | 0.041   | L superior frontal gyrus, paracingulate gyrus         |
|                                     |                                         |  | 30       | -20.7                   | 36.7  | 47.4  | 0.045   | L superior frontal gyrus                              |
|                                     |                                         |  | 24       | -40.9                   | 8.9   | 20.9  | 0.043   | L inferior frontal gyrus                              |
|                                     |                                         |  | 6        | -15.3                   | 37.0  | 52.7  | 0.049   | L frontal pole                                        |
|                                     | L Amygdala* (-23, -4, -19)              |  | 400      | -0.1                    | 40.4  | -3.2  | 0.002   | L frontal medial cortex, paracingulate gyrus          |
|                                     |                                         |  | 320      | -48.6                   | 7.9   | -28.2 | 0.001   | L temporal pole                                       |
|                                     |                                         |  | 191      | 27.3                    | -11.5 | -21.6 | 0.002   | R hippocampus, temporal fusiform cortex (posterior)   |
|                                     |                                         |  | 139      | 28.5                    | -30.5 | -15.6 | 0.003   | R parahippocampal gyrus, hippocampus                  |

|                           |                                                     |  |     |       |       |       |       |                                                   |
|---------------------------|-----------------------------------------------------|--|-----|-------|-------|-------|-------|---------------------------------------------------|
|                           |                                                     |  | 91  | -26.0 | 8.9   | -11.0 | 0.003 | L putamen                                         |
|                           |                                                     |  | 71  | 61.6  | -19.4 | -19.1 | 0.003 | R inferior temporal gyrus (posterior)             |
|                           |                                                     |  | 39  | -5.7  | -17.0 | 0.2   | 0.004 | L thalamus                                        |
|                           |                                                     |  | 35  | -22.4 | -20.1 | -20.2 | 0.004 | L parahippocampal gyrus                           |
|                           |                                                     |  | 13  | 30.0  | 15.1  | -18.2 | 0.004 | R frontal orbital cortex, insula                  |
|                           |                                                     |  | 13  | 48.6  | 3.7   | -23.4 | 0.004 | R superior temporal gyrus                         |
|                           | Precuneus, posterior cingulate cortex (-5, -49, 40) |  | 84  | -33.0 | -2.5  | 0.6   | 0.029 | L putamen                                         |
|                           |                                                     |  | 15  | -48.1 | -9.9  | 14.7  | 0.044 | L central opercular cortex                        |
|                           | Pons (-10, -18, -28)                                |  | 41  | 9.9   | -46.1 | -17.3 | 0.044 | R cerebellum                                      |
|                           |                                                     |  | 4   | -3.0  | -43.5 | -18.5 | 0.048 | L brainstem                                       |
|                           | R Amygdala* (23, -4, -19)                           |  | 55  | 21.0  | -10.5 | -22.7 | 0.004 | R hippocampus, parahippocampal gyrus              |
|                           |                                                     |  | 48  | 16.1  | -36.6 | -5.8  | 0.004 | R parahippocampal gyrus, lingual gyrus            |
|                           |                                                     |  | 39  | -6.56 | -64.3 | -13.8 | 0.004 | L cerebellum                                      |
|                           |                                                     |  | 33  | -23.7 | -11.5 | -21.2 | 0.004 | L hippocampus                                     |
|                           |                                                     |  | 26  | 10.1  | -59.4 | -14.2 | 0.004 | R cerebellum                                      |
|                           |                                                     |  | 19  | -46.6 | 2.2   | -27.1 | 0.004 | L temporal lobe                                   |
|                           |                                                     |  | 18  | 25.4  | -48.9 | -0.9  | 0.004 | R lingual gyrus                                   |
|                           |                                                     |  | 15  | 29.2  | -30   | -12.5 | 0.004 | R parahippocampal gyrus, temporal fusiform cortex |
|                           | R Superior temporal gyrus (56, -32, 2)              |  | 654 | -5.8  | -15.5 | 7.9   | 0.026 | L thalamus                                        |
|                           |                                                     |  | 24  | 22.2  | -30.7 | -7.1  | 0.044 | R hippocampus                                     |
|                           |                                                     |  | 6   | 4.7   | 34.7  | -18.3 | 0.049 | R frontal medial cortex                           |
|                           |                                                     |  | 4   | -2.5  | 35.5  | -19.5 | 0.049 | L frontal medial cortex                           |
|                           | L ventral striatum (inferior) (-9, 9, -8)           |  | 208 | 34.7  | -63.2 | -3.6  | 0.025 | R temporal occipital fusiform gyrus               |
|                           |                                                     |  | 4   | 50.5  | -68.5 | -1.0  | 0.049 | R lateral occipital cortex                        |
| Sleep-by-meal interaction |                                                     |  |     |       |       |       |       |                                                   |
|                           | Frontal pole (10, 62, -8)                           |  | 382 | 32.2  | -71.5 | -12.8 | 0.030 | R temporal occipital fusiform gyrus               |
|                           |                                                     |  | 209 | 18.4  | -53.8 | -6.9  | 0.031 | R lingual gyrus                                   |
|                           |                                                     |  | 204 | 61.6  | -30.5 | 10.7  | 0.033 | R superior temporal gyrus, middle temporal gyrus  |
|                           |                                                     |  | 160 | 44.9  | -77.0 | 2.3   | 0.039 | R lateral occipital cortex                        |
|                           |                                                     |  | 72  | 47.5  | -47.7 | 11.6  | 0.044 | R middle temporal gyrus                           |
|                           |                                                     |  | 23  | 64.0  | -15.7 | 7.9   | 0.046 | R planum temporale                                |
|                           |                                                     |  | 5   | 55.6  | -16.8 | 2.0   | 0.049 | R planum temporale                                |
|                           |                                                     |  | 3   | -30.0 | -72.0 | -12.0 | 0.048 | L occipital fusiform gyrus                        |
|                           | R Superior temporal gyrus (56, -32, 2)              |  | 454 | 54.0  | -56.2 | -0.9  | 0.023 | R occipital fusiform gyrus                        |
|                           |                                                     |  | 7   | 60.9  | -52.3 | -10.3 | 0.049 | R interior temporal gyrus                         |

L, left hemisphere; MNI, Montreal Neurological Institute; R, right hemisphere
