# Supplementary material
Source: PubMed Central journal article supplement (PMC5101157)
Supplement: NIHMS800458-supplement-3.pdf [file NIHMS800458-supplement-3.pdf]

## Main effect of meal (late > normal)

Altered RSFC between R Amygdala seed (23, -4, -19) and 8 clusters.  
Highlighted are findings in R Parahippocampal cluster (14, -36, -6).

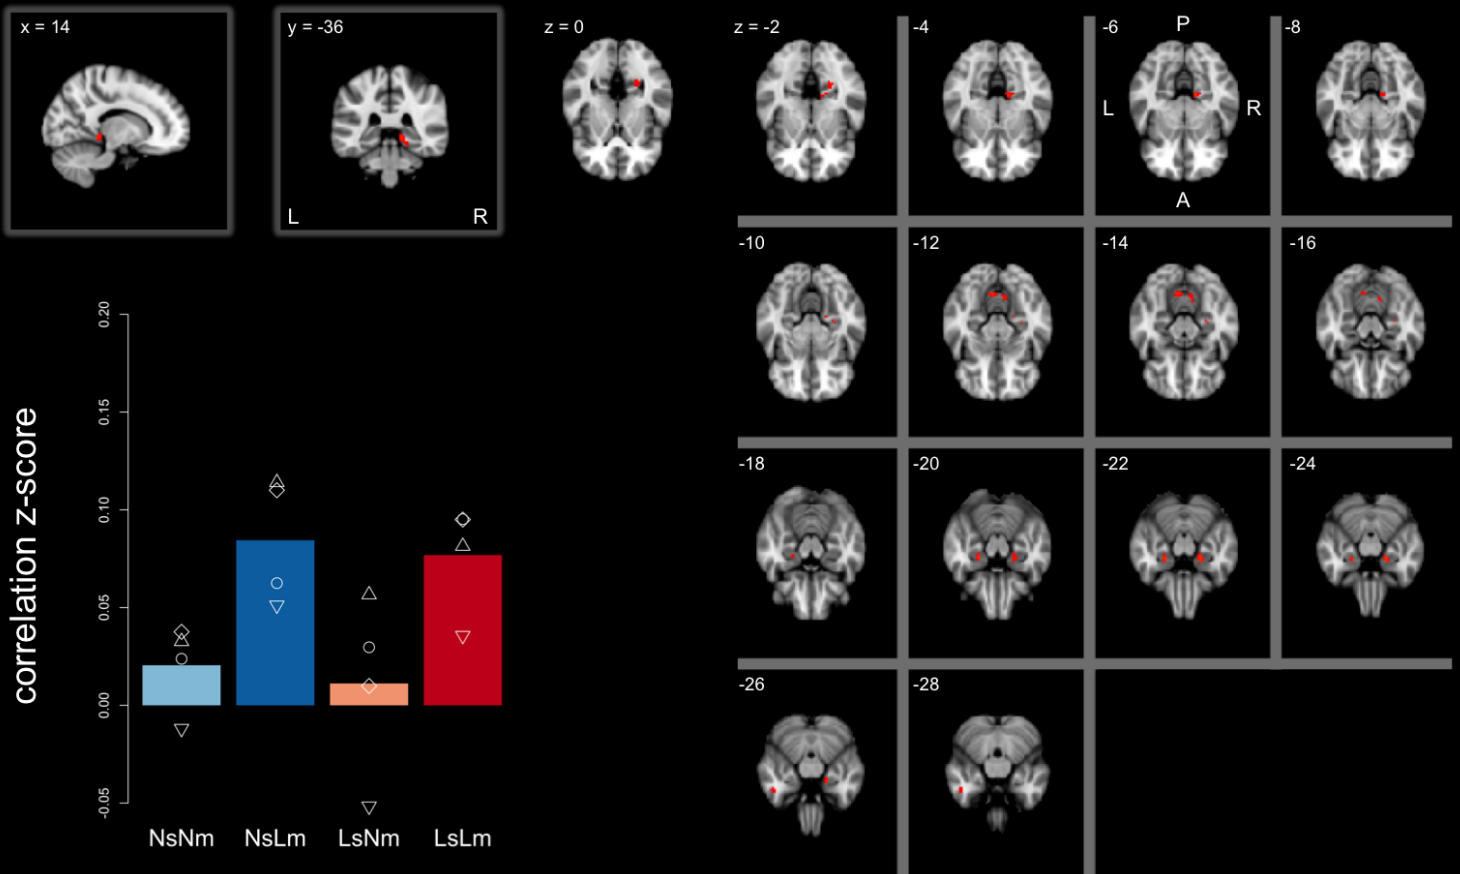

**Figure S1.** Seed-based RSFC for Right Amygdala seed. Regions showing significant ( $P < 0.005$ , controlling for FWE) RSFC increase in late > normal meal overlaid on the MNI152 template.

Bar graph plots the Fisher z-transformed correlation (overlaid white shapes are individual values) between R Amygdala and the cluster peaking at  $x = 14$ ,  $y = -36$ ,  $z = -6$  (MNI) for each of the 4 conditions: normal sleep/normal meal (NsNm), normal sleep/late meal (NsLm), late sleep/normal meal (LsNm), and late sleep/late meal (LsLm).

A, anterior; FWE, family-wise error; L, left; MNI, Montreal Neurological Institute; P, posterior; RSFC, resting-state functional connectivity; R, right.
